# Supplementary material for: Long-Term Stability Prediction for Developability Assessment of Biopharmaceutics Using Advanced Kinetic Modeling
Source: Pharmaceutics. 2022 Feb 8;14(2):375. doi: 10.3390/pharmaceutics14020375 (PMC8880208; doi:10.3390/pharmaceutics14020375)
Supplement: Supplementary file 1 [file pharmaceutics-14-00375-s001.zip › pharmaceutics-1542972-supplementary/SM_Experimental Data.xlsx]

## Sheet: HPLC data
			experimental HPLC data; Purity [%]
			accelerated data used for model generation							long-term data (not used for model building)
			time [days]							time [days]
	Temperature [°C]		0	13	33	46	60	90		180	270	730	730+28 at 30°C
Combi_F1-PM1	5		98.046	98.046	98.08	97.395	97.619	97.989		97.33	97.1	95.29	94.6
Combi_F1-PM1	25		98.046	97.733	96.945	95.83	95.719	95.183
Combi_F1-PM1	30		98.046	97.557	96.305	95.487	94.478	93.048
Combi_F1-PM1	37		98.046	96.514	93.875	91.384	89.613	85.913
Combi_F1-PM1	40		98.046	96.139	92.385	88.887	87.188	82.071
Combi_F2-PM1	5		97.904	97.904	97.96	97.259	97.781	97.686		96.611	97.225	94.93	93.87
Combi_F2-PM1	25		97.904	97.594	96.47	95.535	95.491	94.785
Combi_F2-PM1	30		97.904	97.31	95.73	94.994	93.955	92.499
Combi_F2-PM1	37		97.904	96.248	93.69	91.184	89.51	85.71
Combi_F2-PM1	40		97.904	95.843	91.945	88.934	86.216	80.587
Combi_F3-PM1	5		97.98	97.98	97.9	97.351	97.695	97.873		97.659	97.547	95.64	94.72
Combi_F3-PM1	25		97.98	97.592	96.785	96.076	95.699	95.337
Combi_F3-PM1	30		97.98	97.509	96.02	94.923	94.442	93.185
Combi_F3-PM1	37		97.98	96.45	93.61	91.379	90.014	86.42
Combi_F3-PM1	40		97.98	96.277	92.005	89.478	87.363	82.718
Combi_F1-PM2	5		97.784	97.784	97.898	97.646	97.576	97.947		97.315		95.63	94.4
Combi_F1-PM2	25		97.784	97.502	96.943	96.358	96.28	95.316
Combi_F1-PM2	30		97.784	97.187	96.416	95.141	94.835	93.099
Combi_F1-PM2	37		97.784	96.229	93.774	91.707	90.305	85.768
Combi_F1-PM2	40		97.784	96.087	91.88	89.371	87.436	82.349
Combi_F2-PM2	5		97.666	97.666	97.777	97.482	97.458	97.826		96.891		95.27	93.7
Combi_F2-PM2	25		97.666	97.345	96.853	95.913	95.82	94.792
Combi_F2-PM2	30		97.666	97.087	96.193	94.894	94.475	92.563
Combi_F2-PM2	37		97.666	96.119	93.246	91.364	90.039	85.605
Combi_F2-PM2	40		97.666	95.517	91.926	89.49	87.027	80.983
Combi_F3-PM2	5		97.754	97.754	97.708	97.521	97.946	97.833		97.187		95.97	94.4
Combi_F3-PM2	25		97.754	97.628	97.062	96.472	96.356	95.128
Combi_F3-PM2	30		97.754	97.336	96.428	95.28	94.693	93.014
Combi_F3-PM2	37		97.754	96.396	93.775	91.786	90.121	86.094
Combi_F3-PM2	40		97.754	95.981	92.164	90.028	87.818	83.198

## Sheet: HMWP data
			experimental SEC data; HMWP [%]
			accelerated data used for model generation										long-term data (not used for model building)
			time [days]										time [days]
PM	Temperature [°C]		0	13	33	35	45	60	61	96	97		180	270	730	730+28 at 30°C
Combi_F1-PM1	5		0.23	0.25325	0.3025		0.3145	0.328		0.38			0.6	0.55	0.84	1.13
Combi_F1-PM1	25		0.23	0.33905	0.5445		0.642	0.704		0.87
Combi_F1-PM1	30		0.23	0.40945	0.628		0.773	0.863		1.042
Combi_F1-PM1	37		0.23	0.50785	0.8805		1.0705	1.198		1.49
Combi_F1-PM1	40		0.23	0.5711	0.9985		1.2425	1.364		1.65
Combi_F2-PM1	5		0.22	0.24255	0.231		0.258	0.258		0.307			0.338	0.46	0.75	1.16
Combi_F2-PM1	25		0.22	0.30375	0.457		0.568	0.642		0.834
Combi_F2-PM1	30		0.22	0.3504	0.574		0.7235	0.834		1.098
Combi_F2-PM1	37		0.22	0.4743	0.88		1.1275	1.273		1.66
Combi_F2-PM1	40		0.22	0.53525	1.027		1.3115	1.528		1.885
Combi_F3-PM1	5		0.22	0.23865	0.268		0.2735	0.286		0.349			0.4	0.57	0.81	1.12
Combi_F3-PM1	25		0.22	0.29805	0.497		0.591	0.659		0.832
Combi_F3-PM1	30		0.22	0.35455	0.583		0.724	0.807		1.003
Combi_F3-PM1	37		0.22	0.4565	0.819		1.027	1.159		1.407
Combi_F3-PM1	40		0.22	0.5112	0.927		1.1665	1.313		1.594
Combi_F1-PM2	5		0.26	0.336	0.406		0.486		0.534		0.574			0.66	0.89	1.21
Combi_F1-PM2	25		0.26	0.5209	0.6855		0.7535		0.787		0.889
Combi_F1-PM2	30		0.26	0.5963	0.756		0.856		0.913		1.062
Combi_F1-PM2	37		0.26	0.67645	0.819		1.115		1.269		1.52
Combi_F1-PM2	40		0.26	0.73345	1.08		1.2825		1.427		1.792
Combi_F2-PM2	5		0.23	0.30805		0.414	0.443		0.486		0.572		0.584	0.68	0.95	1.3
Combi_F2-PM2	25		0.23	0.5045		0.719	0.809		0.85		0.965
Combi_F2-PM2	30		0.23	0.57425		0.803	0.92		0.996		1.166
Combi_F2-PM2	37		0.23	0.71185		1.013	1.229		1.389		1.708
Combi_F2-PM2	40		0.23	0.7433		1.146	1.3945		1.598		2.083
Combi_F3-PM2	5		0.2	0.3102		0.381	0.4135		0.459		0.535		0.56	0.63	0.87	1.12
Combi_F3-PM2	25		0.2	0.5022		0.656	0.7225		0.768		0.861
Combi_F3-PM2	30		0.2	0.5411		0.72	0.827		0.883		1.029
Combi_F3-PM2	37		0.2	0.6685		0.915	1.0955		1.222		1.489
Combi_F3-PM2	40		0.2	0.70375		1.009	1.22		1.365		1.759
